# Supplementary material for: Acoustic pressure and particle motion thresholds in six sciaenid fishes
Source: Oxford University Press journal article supplement (doi:10.1242/jeb.016196), 2008-04-18
Supplement: jeb016196-sup-016196-tabless1.pdf [file jeb016196-sup-016196-tabless1.pdf]

Table S1. Auditory brainstem response thresholds for six sciaenid fishes expressed as the relevant sound pressure (dB re: 1 mPa) recorded by the hydrophone and particle velocity ( $\text{m s}^{-1}$ ) recorded by the geophone

| Species             | Sound pressure<br>(dB re: 1 $\mu\text{Pa}$ ) $\pm$ s.e.m. | Recorded particle velocity<br>( $\text{m s}^{-1}$ ) | Calculated particle acceleration<br>( $\text{m s}^{-2}$ ) $\pm$ s.e.m. |
|---------------------|-----------------------------------------------------------|-----------------------------------------------------|------------------------------------------------------------------------|
| <i>C. nebulosus</i> |                                                           |                                                     |                                                                        |
| 100 Hz              | 102.6 $\pm$ 3.2                                           | 3.59310 <sup>-5</sup>                               | 0.023 $\pm$ 0.008                                                      |
| 200 Hz              | 100.2 $\pm$ 2.7                                           | 2.03310 <sup>-5</sup>                               | 0.026 $\pm$ 0.006                                                      |
| 300 Hz              | 97.8 $\pm$ 1.9                                            | 8.01310 <sup>-6</sup>                               | 0.015 $\pm$ 0.003                                                      |
| 400 Hz              | 97.5 $\pm$ 2.1                                            | 2.59310 <sup>-6</sup>                               | 0.007 $\pm$ 0.002                                                      |
| 500 Hz              | 96.4 $\pm$ 1.6                                            | 4.03310 <sup>-6</sup>                               | 0.013 $\pm$ 0.002                                                      |
| 600 Hz              | 105.9 $\pm$ 2.7                                           | 1.17310 <sup>-5</sup>                               | 0.044 $\pm$ 0.009                                                      |
| 700 Hz              | 115.5 $\pm$ 2.8                                           | 4.38310 <sup>-5</sup>                               | 0.193 $\pm$ 0.043                                                      |
| 800 Hz              | 123.6 $\pm$ 1.0                                           | 3.80310 <sup>-5</sup>                               | 0.191 $\pm$ 0.017                                                      |
| 900 Hz              | 130.7 $\pm$ 1.8                                           | 3.90310 <sup>-5</sup>                               | 0.220 $\pm$ 0.028                                                      |
| 1000 Hz             | 133.7 $\pm$ 1.6                                           | 9.73310 <sup>-5</sup>                               | 0.611 $\pm$ 0.093                                                      |
| 1100 Hz             | 133.9 $\pm$ 1.5                                           | 1.60310 <sup>-4</sup>                               | 1.10 $\pm$ 0.168                                                       |
| 1200 Hz             | 133.7 $\pm$ 1.6                                           | 7.80310 <sup>-5</sup>                               | 0.587 $\pm$ 0.078                                                      |
| <i>C. regalis</i>   |                                                           |                                                     |                                                                        |
| 100 Hz              | 104.2 $\pm$ 4.0                                           | 9.60310 <sup>-6</sup>                               | 0.006 $\pm$ 0.002                                                      |
| 200 Hz              | 100.0 $\pm$ 4.3                                           | 7.20310 <sup>-6</sup>                               | 0.009 $\pm$ 0.004                                                      |
| 300 Hz              | 96.4 $\pm$ 2.7                                            | 4.15310 <sup>-6</sup>                               | 0.008 $\pm$ 0.002                                                      |
| 400 Hz              | 98.8 $\pm$ 2.9                                            | 5.30310 <sup>-6</sup>                               | 0.013 $\pm$ 0.004                                                      |
| 500 Hz              | 97.3 $\pm$ 2.0                                            | 4.21310 <sup>-6</sup>                               | 0.013 $\pm$ 0.002                                                      |
| 600 Hz              | 96.5 $\pm$ 1.4                                            | 3.75310 <sup>-6</sup>                               | 0.014 $\pm$ 0.002                                                      |
| 700 Hz              | 104.4 $\pm$ 5.4                                           | 1.30310 <sup>-5</sup>                               | 0.057 $\pm$ 0.030                                                      |
| 800 Hz              | 106.7 $\pm$ 6.8                                           | 1.90310 <sup>-5</sup>                               | 0.095 $\pm$ 0.052                                                      |
| 900 Hz              | 116.3 $\pm$ 6.2                                           | 3.21310 <sup>-5</sup>                               | 0.018 $\pm$ 0.067                                                      |
| 1000 Hz             | 125.9 $\pm$ 5.9                                           | 6.15310 <sup>-5</sup>                               | 0.387 $\pm$ 0.124                                                      |
| 1100 Hz             | 135.7 $\pm$ 4.1                                           | 1.10310 <sup>-4</sup>                               | 0.697 $\pm$ 0.133                                                      |
| 1200 Hz             | 141.6 $\pm$ 0.7                                           | 1.30310 <sup>-4</sup>                               | 0.979 $\pm$ 0.010                                                      |
| <i>M. undulatus</i> |                                                           |                                                     |                                                                        |
| 100 Hz              | 95.8 $\pm$ 3.3                                            | 4.41310 <sup>-6</sup>                               | 0.003 $\pm$ 0.001                                                      |
| 200 Hz              | 95.9 $\pm$ 4.4                                            | 5.33310 <sup>-6</sup>                               | 0.007 $\pm$ 0.003                                                      |
| 300 Hz              | 94.9 $\pm$ 2.3                                            | 3.47310 <sup>-6</sup>                               | 0.007 $\pm$ 0.002                                                      |
| 400 Hz              | 98.6 $\pm$ 5.2                                            | 8.18310 <sup>-6</sup>                               | 0.021 $\pm$ 0.013                                                      |
| 500 Hz              | 100.3 $\pm$ 5.2                                           | 8.04310 <sup>-6</sup>                               | 0.025 $\pm$ 0.010                                                      |
| 600 Hz              | 104.3 $\pm$ 4.0                                           | 9.5310 <sup>-6</sup>                                | 0.036 $\pm$ 0.011                                                      |
| 700 Hz              | 109.3 $\pm$ 4.8                                           | 1.65310 <sup>-5</sup>                               | 0.073 $\pm$ 0.029                                                      |
| 800 Hz              | 112.1 $\pm$ 3.9                                           | 1.86310 <sup>-5</sup>                               | 0.094 $\pm$ 0.032                                                      |
| 900 Hz              | 115.0 $\pm$ 3.6                                           | 2.24310 <sup>-5</sup>                               | 0.127 $\pm$ 0.038                                                      |
| 1000 Hz             | 121.5 $\pm$ 3.2                                           | 3.48310 <sup>-5</sup>                               | 0.022 $\pm$ 0.040                                                      |
| 1100 Hz             | 127.4 $\pm$ 2.7                                           | 5.27310 <sup>-5</sup>                               | 0.364 $\pm$ 0.070                                                      |
| 1200 Hz             | 135.1 $\pm$ 4.0                                           | 9.62310 <sup>-5</sup>                               | 0.725 $\pm$ 0.140                                                      |
| <i>S. ocellatus</i> |                                                           |                                                     |                                                                        |
| 100 Hz              | 102.6 $\pm$ 1.6                                           | 6.63310 <sup>-6</sup>                               | 0.004 $\pm$ 0.001                                                      |
| 200 Hz              | 99.6 $\pm$ 1.9                                            | 5.18310 <sup>-6</sup>                               | 0.007 $\pm$ 0.001                                                      |
| 300 Hz              | 99.3 $\pm$ 3.3                                            | 5.83310 <sup>-6</sup>                               | 0.011 $\pm$ 0.003                                                      |
| 400 Hz              | 100.3 $\pm$ 4.4                                           | 7.69310 <sup>-6</sup>                               | 0.019 $\pm$ 0.009                                                      |
| 500 Hz              | 103.8 $\pm$ 4.5                                           | 1.03310 <sup>-5</sup>                               | 0.032 $\pm$ 0.013                                                      |
| 600 Hz              | 106.7 $\pm$ 5.2                                           | 1.47310 <sup>-5</sup>                               | 0.056 $\pm$ 0.025                                                      |
| 700 Hz              | 111.2 $\pm$ 5.2                                           | 2.09310 <sup>-5</sup>                               | 0.092 $\pm$ 0.040                                                      |
| 800 Hz              | 120.2 $\pm$ 2.4                                           | 3.03310 <sup>-5</sup>                               | 0.152 $\pm$ 0.027                                                      |
| 900 Hz              | 127.6 $\pm$ 1.6                                           | 5.08310 <sup>-5</sup>                               | 0.287 $\pm$ 0.039                                                      |
| 1000 Hz             | 133.4 $\pm$ 0.7                                           | 7.47310 <sup>-5</sup>                               | 0.470 $\pm$ 0.023                                                      |
| 1100 Hz             | 132.3 $\pm$ 1.0                                           | 6.98310 <sup>-5</sup>                               | 0.482 $\pm$ 0.035                                                      |
| 1200 Hz             | 131.4 $\pm$ 1.1                                           | 6.54310 <sup>-5</sup>                               | 0.493 $\pm$ 0.038                                                      |
| <i>L. xanthurus</i> |                                                           |                                                     |                                                                        |
| 100 Hz              | 101.0 $\pm$ 3.6                                           | 7.23310 <sup>-6</sup>                               | 0.005 $\pm$ 0.002                                                      |
| 200 Hz              | 99.2 $\pm$ 2.7                                            | 5.44310 <sup>-6</sup>                               | 0.007 $\pm$ 0.002                                                      |
| 300 Hz              | 103.7 $\pm$ 4.2                                           | 9.52310 <sup>-6</sup>                               | 0.018 $\pm$ 0.006                                                      |
| 400 Hz              | 105.9 $\pm$ 2.8                                           | 9.77310 <sup>-6</sup>                               | 0.025 $\pm$ 0.005                                                      |
| 500 Hz              | 112.7 $\pm$ 2.4                                           | 1.69310 <sup>-5</sup>                               | 0.053 $\pm$ 0.011                                                      |
| 600 Hz              | 117.7 $\pm$ 3.8                                           | 2.81310 <sup>-5</sup>                               | 0.106 $\pm$ 0.030                                                      |
| 700 Hz              | 121.7 $\pm$ 3.8                                           | 3.72310 <sup>-5</sup>                               | 0.164 $\pm$ 0.041                                                      |
| 800 Hz              | 125.0 $\pm$ 2.8                                           | 4.44310 <sup>-5</sup>                               | 0.223 $\pm$ 0.039                                                      |
| 900 Hz              | 126.2 $\pm$ 2.7                                           | 4.78310 <sup>-5</sup>                               | 0.270 $\pm$ 0.043                                                      |
| 1000 Hz             | 127.2 $\pm$ 2.8                                           | 5.14310 <sup>-5</sup>                               | 0.323 $\pm$ 0.049                                                      |
| 1100 Hz             | 137.5 $\pm$ 2.3                                           | 1.04310 <sup>-4</sup>                               | 0.717 $\pm$ 0.094                                                      |
| 1200 Hz             | 141.0 $\pm$ 0.2                                           | 1.25310 <sup>-4</sup>                               | 0.943 $\pm$ 0.010                                                      |
| <i>M. saxatilis</i> |                                                           |                                                     |                                                                        |
| 100 Hz              | 110.23 $\pm$ 2.2                                          | 1.35310 <sup>-5</sup>                               | 0.0085 $\pm$ 0.002                                                     |
| 200 Hz              | 101.72 $\pm$ 3.3                                          | 7.27310 <sup>-6</sup>                               | 0.0091 $\pm$ 0.003                                                     |
| 300 Hz              | 97.88 $\pm$ 4.0                                           | 6.01310 <sup>-6</sup>                               | 0.0113 $\pm$ 0.006                                                     |
| 400 Hz              | 99.63 $\pm$ 1.9                                           | 5.21310 <sup>-6</sup>                               | 0.0131 $\pm$ 0.002                                                     |
| 500 Hz              | 98.61 $\pm$ 1.3                                           | 4.56310 <sup>-6</sup>                               | 0.0143 $\pm$ 0.002                                                     |
| 600 Hz              | 100.44 $\pm$ 2.3                                          | 5.75310 <sup>-6</sup>                               | 0.0217 $\pm$ 0.004                                                     |
| 700 Hz              | 98.58 $\pm$ 2.8                                           | 5.03310 <sup>-6</sup>                               | 0.0221 $\pm$ 0.005                                                     |
| 800 Hz              | 97.84 $\pm$ 2.9                                           | 4.79310 <sup>-6</sup>                               | 0.0241 $\pm$ 0.006                                                     |
| 900 Hz              | 107.31 $\pm$ 2.4                                          | 1.08310 <sup>-5</sup>                               | 0.0611 $\pm$ 0.015                                                     |
| 1000 Hz             | 117.49 $\pm$ 5.1                                          | 3.08310 <sup>-5</sup>                               | 0.1937 $\pm$ 0.061                                                     |
| 1100 Hz             | 140.63 $\pm$ 0.5                                          | 1.22310 <sup>-4</sup>                               | 0.8453 $\pm$ 0.027                                                     |
| 1200 Hz             | 141.18 $\pm$ 0.5                                          | 1.26310 <sup>-4</sup>                               | 0.9536 $\pm$ 0.031                                                     |

Particle acceleration ( $\text{m s}^{-2}$ ) was calculated from the recorded particle velocity using Eqn 1.
